# Supplementary material
Source: Springer Nature journal article supplement (https://www.springermedizin.de/resource/supplementary/12936_2005_191_MOESM2_ESM.pdf/9547140)

### A. Dry season

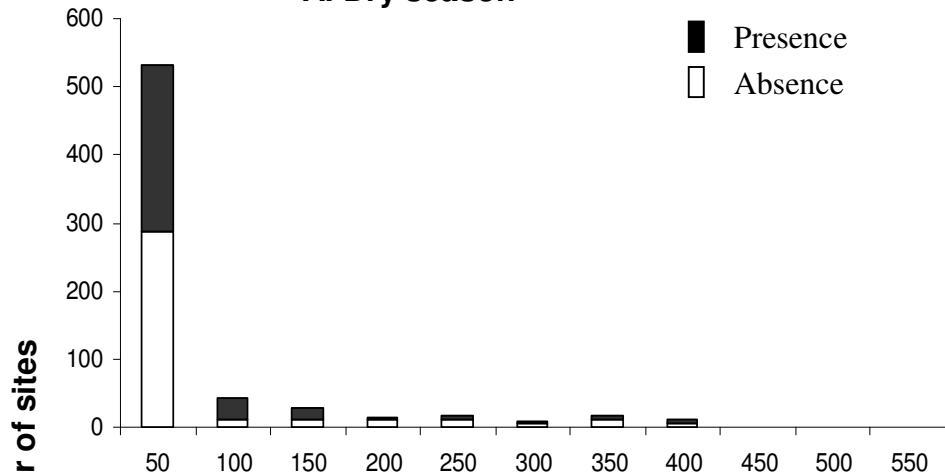

### B. Rainy season

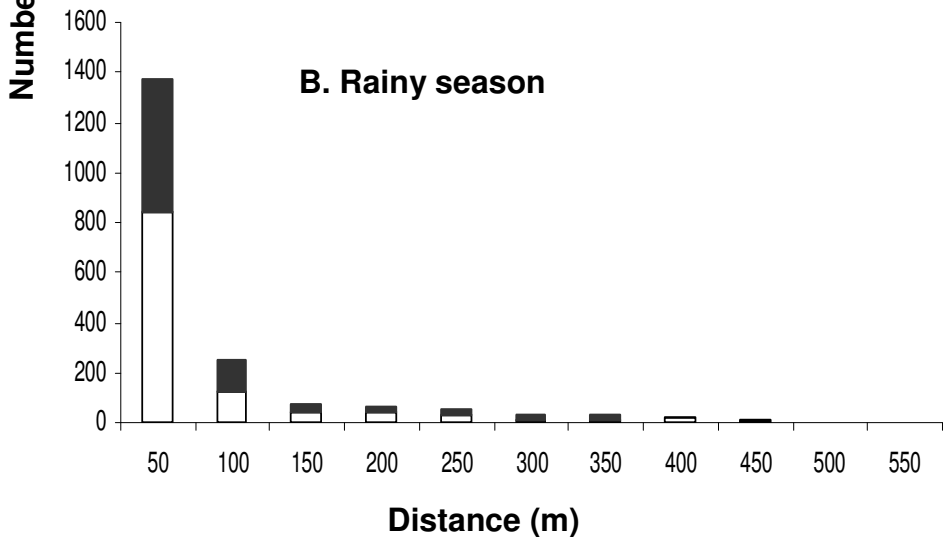

Supplement: MOESM2 [file 9547140]
